# Supplementary material for: Influence of Genotype on Antioxidant Activity and Phenolic Profile of Fennel Bulbs
Source: MDPI journal article supplement (doi:10.3390/agronomy14030484), 2024-02-28
Supplement: s1 [file s1]

Archive with 1 entries (1 files):
- agronomy-2872501-supplementary.pdf
