# Supplementary material for: Influence of Genotype on Antioxidant Activity and Phenolic Profile of Fennel Bulbs
Source: MDPI journal article supplement (doi:10.3390/agronomy14030484), 2024-02-28
Supplement: s1 [file s1 › agronomy-2872501-supplementary.pdf]

# Influence of Genotype on Antioxidant Activity and Phenolic Profile of Fennel Bulbs

Alfonso Rubio, Antonio López-Orenes, María A. Ferrer\* and Antonio A. Calderón

## Table of contents:

|                                                                                                                                                                                                                                                                                                                                                           |   |
|-----------------------------------------------------------------------------------------------------------------------------------------------------------------------------------------------------------------------------------------------------------------------------------------------------------------------------------------------------------|---|
| <b>Figure S1.</b> HPLC chromatograms recorded at 328 nm of the methanol (left panels), aqueous-methanol (middle panels), and hot water (right panels) extracts from bulbs of the fennel variety I (A), II (B), III (C) and IV (D). _____                                                                                                                  | 2 |
| <b>Figure S2.</b> UV-Vis spectra of representative peaks of caffeic acid derivatives resolved by HPLC in the different extract analyzed. From top to bottom, spectra corresponding to the peaks with retention times 7.6, 11.6, 14.8, 19.2 and 32.5 min, respectively. _____                                                                              | 3 |
| <b>Figure S3.</b> Chromatograms of the aqueous extract of variety IV obtained by using HPLC-MS in the negative mode at m/z ratios 353 (A) and 179 (B), corresponding to the molecular ions of chlorogenic and caffeic acids, respectively. Fragmentation patterns corresponding to the numbered peaks in the chromatograms are shown in the insets. _____ | 4 |
| <b>Figure S4.</b> Chromatograms of the aqueous extract of variety IV obtained by using HPLC-MS in the negative mode at m/z ratios 353 (A) and 519 (B), corresponding to the molecular ions of mono- and di-caffeoylquinic acids, respectively. Fragmentation patterns corresponding to the numbered peaks in the chromatograms are also shown. _____      | 5 |

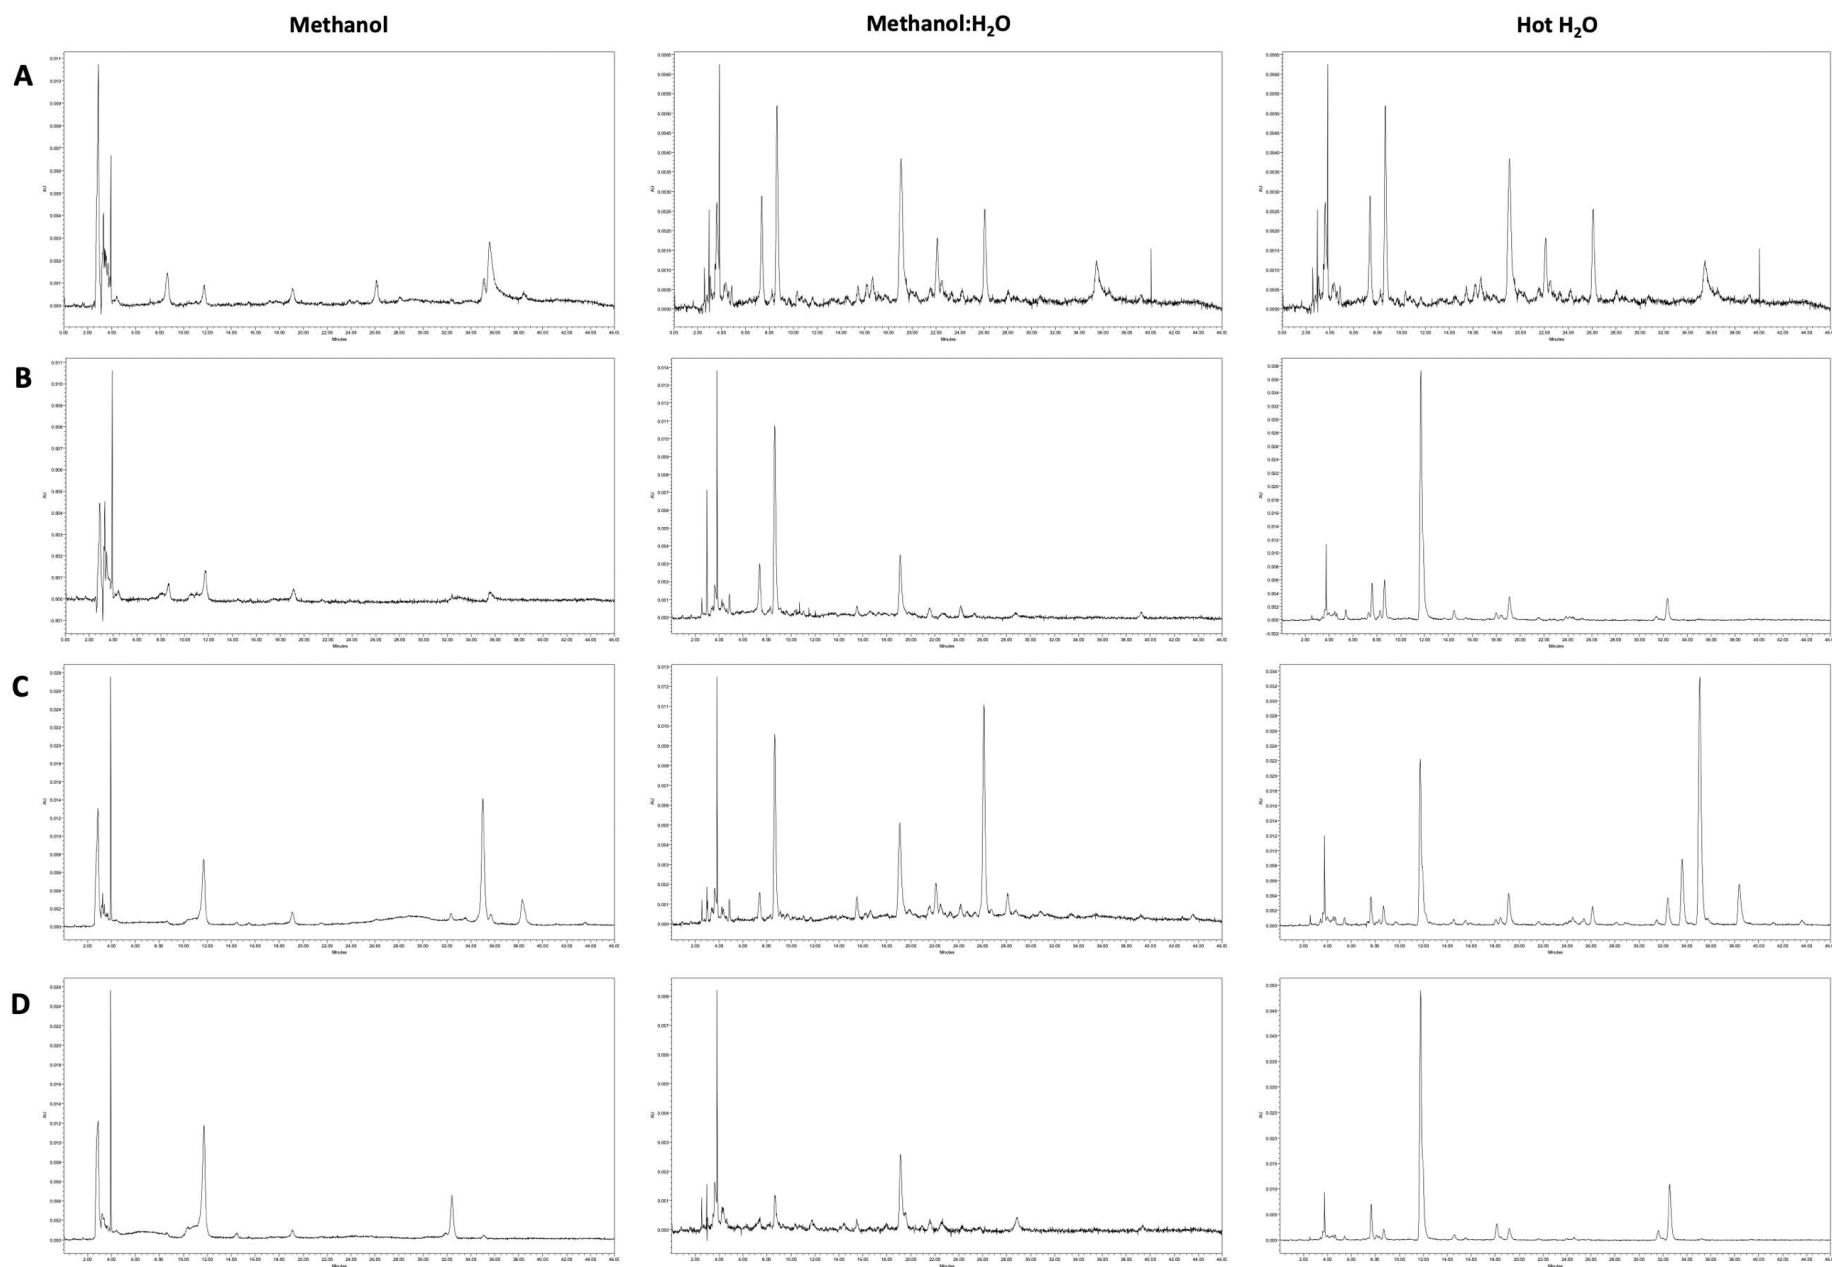

**Figure S1.** HPLC chromatograms recorded at 328 nm of the methanol (left panels), aqueous-methanol (middle panels), and hot water (right panels) extracts from bulbs of the fennel variety I (A), II (B), III (C) and IV (D).

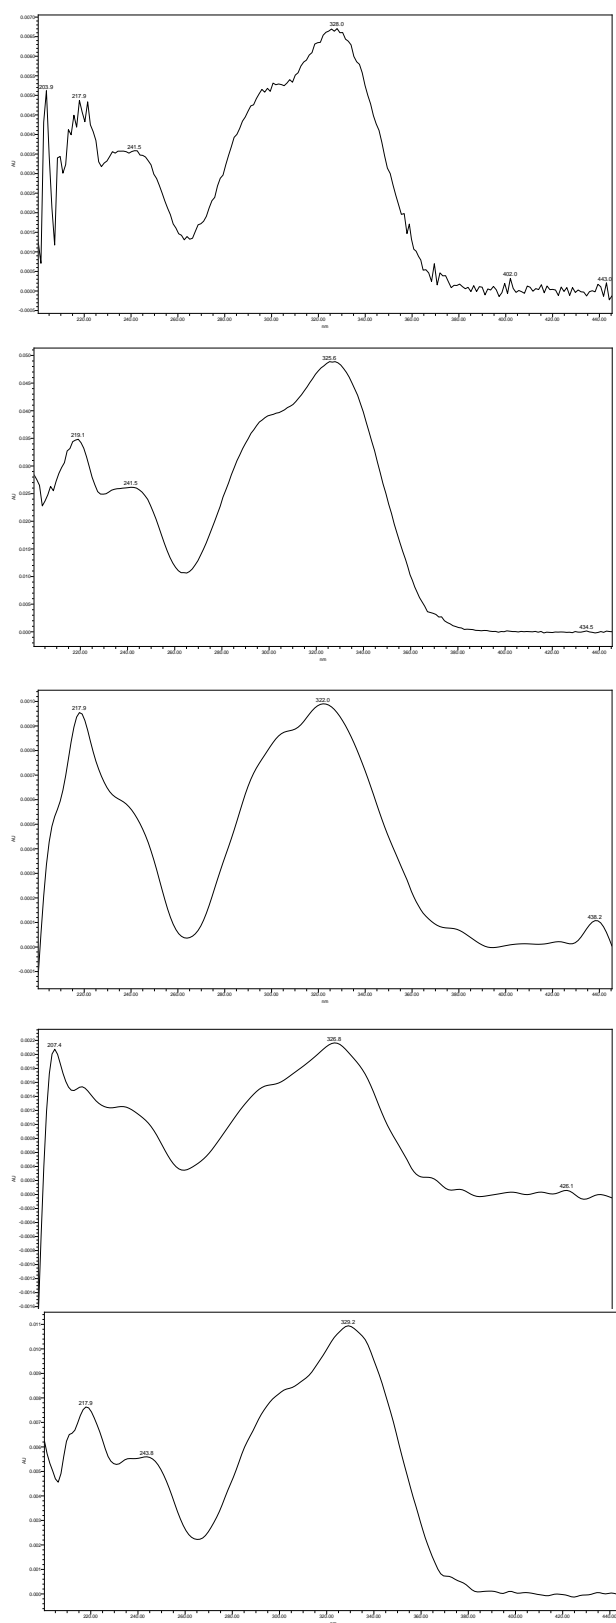

**Figure S2.** UV-Vis spectra of representative peaks of caffeic acid derivatives resolved by HPLC in the different extract analyzed. From top to bottom, spectra corresponding to the peaks with retention times 7.6, 11.6, 14.8, 19.2 and 32.5 min, respectively.

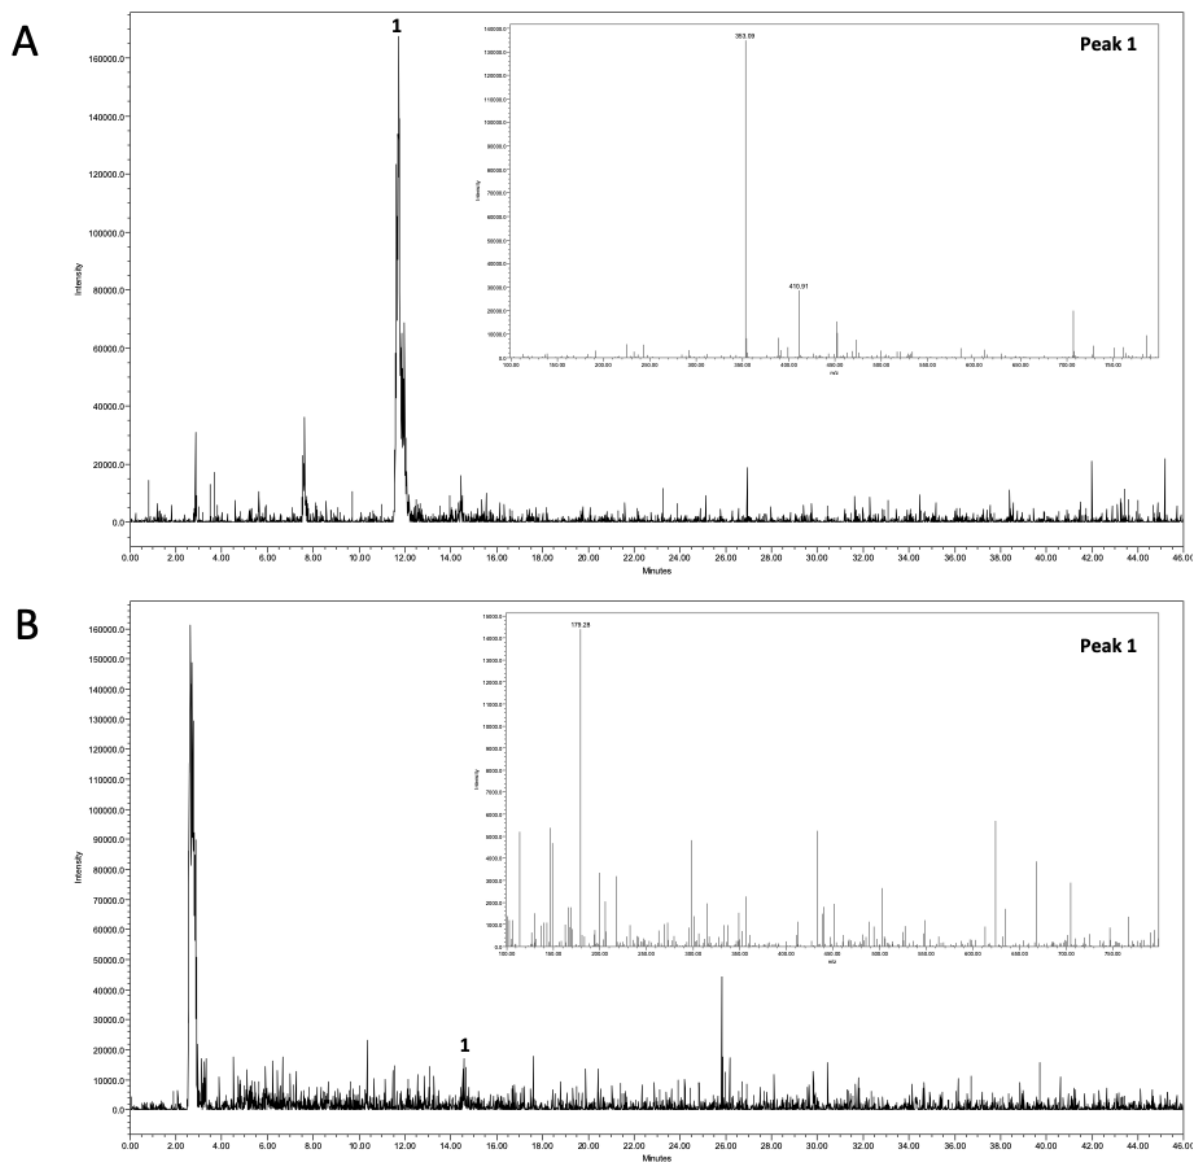

**Figure S3.** Chromatograms of the aqueous extract of variety IV obtained by using HPLC-MS in the negative mode at  $m/z$  ratios 353 (A) and 179 (B), corresponding to the molecular ions of chlorogenic and caffeic acids, respectively. Fragmentation patterns corresponding to the numbered peaks in the chromatograms are shown in the insets.

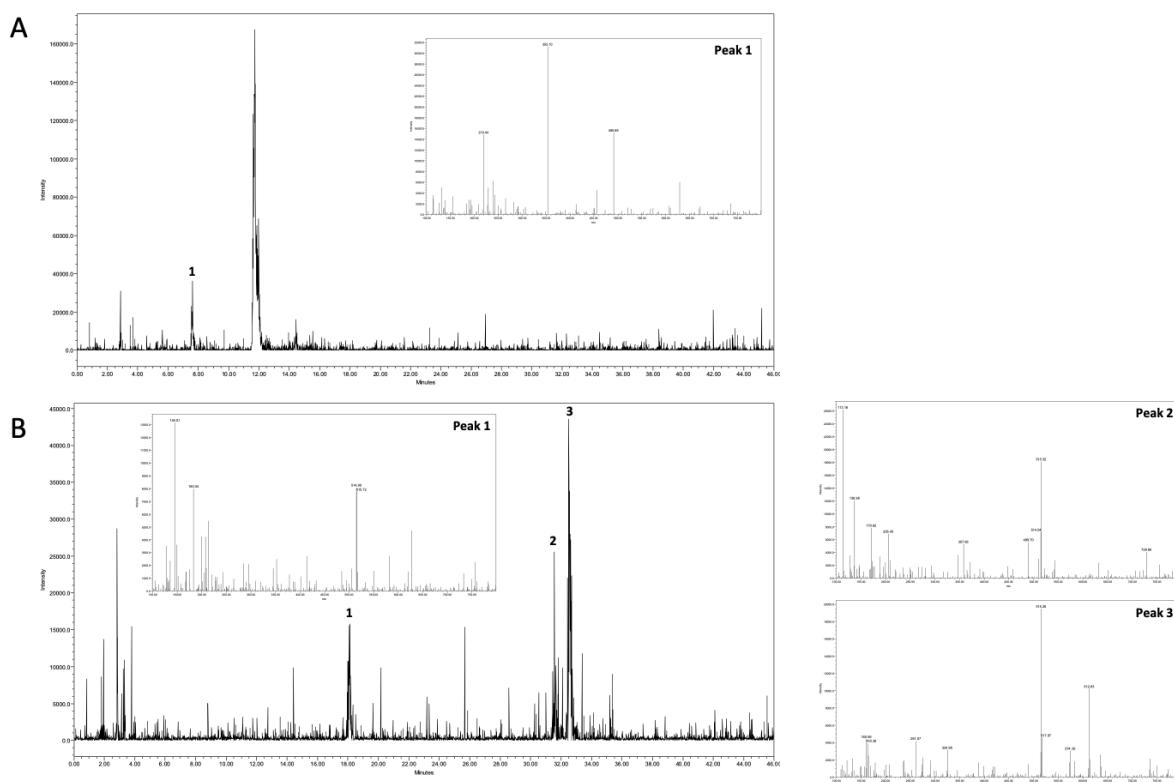

**Figure S4.** Chromatograms of the aqueous extract of variety IV obtained by using HPLC-MS in the negative mode at m/z ratios 353 (A) and 519 (B), corresponding to the molecular ions of mono- and di-caffeoylquinic acids, respectively. Fragmentation patterns corresponding to the numbered peaks in the chromatograms are also shown
